# Supplementary material
Source: PubMed Central journal article supplement (PMC11382596)
Supplement: NIHMS2018594-supplement-eTable.pdf [file NIHMS2018594-supplement-eTable.pdf]

## Supplementary Online Content

Filippi M, Preziosa P, Barkhof F, et al. Diagnosis of progressive multiple sclerosis from the imaging perspective: a review. *JAMA Neurol*. Published online December 14, 2020.  
doi:10.1001/jamaneurol.2020.4689

### **eTable.** Search Strategy and Selection Criteria

This supplementary material has been provided by the authors to give readers additional information about their work.

**eTable.** Search Strategy and Selection Criteria

|                                                  |                                                                                                                                                                                                                                                                                                                                                                                                                                                                                                                                                                                                                                                                                         |
|--------------------------------------------------|-----------------------------------------------------------------------------------------------------------------------------------------------------------------------------------------------------------------------------------------------------------------------------------------------------------------------------------------------------------------------------------------------------------------------------------------------------------------------------------------------------------------------------------------------------------------------------------------------------------------------------------------------------------------------------------------|
| <b>Sources</b>                                   | 1. Pubmed ( <a href="https://www.ncbi.nlm.nih.gov/pubmed">https://www.ncbi.nlm.nih.gov/pubmed</a> )                                                                                                                                                                                                                                                                                                                                                                                                                                                                                                                                                                                     |
| <b>Period of time covered</b>                    | 1. Pubmed: From January 1979 until June 2020                                                                                                                                                                                                                                                                                                                                                                                                                                                                                                                                                                                                                                            |
| <b>Search terms</b>                              | “Atrophy”, “Biomarkers”, “Cognition”, “Cognitive Impairment”, “Comorbidities”, “Cortical”, “Deep Learning”, “Demyelination”, “Dirty-Appearing White Matter”, “fMRI”, “Gray Matter”, “Hippocampus”, “Inflammation”, “Leptomeningeal Inflammation”, “Lesion/s”, “MRI”, “Machine Learning”, “Multiple Sclerosis”, “Normal-Appearing White Matter”, “Neurodegeneration”, “Primary Progressive”, “Progressive”, “Remyelination”, “Secondary Progressive”, “Spinal Cord”, “Subpial Demyelination”, “Thalamus”, “White matter”                                                                                                                                                                 |
| <b>Selection criteria and review preparation</b> | <ol style="list-style-type: none"> <li>1. Only papers published in English;</li> <li>2. The final reference list was generated with the consensus of all co-authors of this review on the basis of originality and relevance to the broad scope of this review, with a focus on the most recent articles;</li> <li>3. Experts provided a summary during the meeting of the main findings related to specific topics of the review. For each topic, a group consensus was reached and summarized in a first draft, which was circulated among the co-authors for further critical discussion and revision. The review represents the final conclusions reached by co-authors.</li> </ol> |
